# Supplementary material
Source: publisher figshare collection journal article supplement (https://acs.figshare.com/ndownloader/files/4728841)
Supplement: Supplementary file 1 [file 4728841]

## Supporting Information

# Green synthesis and characterization of anisotropic uniform single-crystal $\alpha$ -MoO<sub>3</sub> nanostructures

*Liang Fang<sup>a,b</sup>, Yuying Shu<sup>a</sup>, Aiqin Wang<sup>a</sup>, Tao Zhang<sup>a</sup>*

<sup>a</sup> State Key Laboratory of Catalysis, Dalian Institute of Chemical Physics,

Chinese Academy of Sciences, Dalian 116023, China;

<sup>b</sup> Graduate School of the Chinese Academy of Sciences, Beijing 100049, China.

## The determination of the nominal formula of the sample obtained at 81.5 °C

Under vacuum conditions, molybdenum peroxo complex is decomposed into molybdenum trioxide, water, and oxygen from about 147 °C to around 257 °C [1].

The decomposition of the sample obtained at 81.5 °C could be shown in Equation (1):

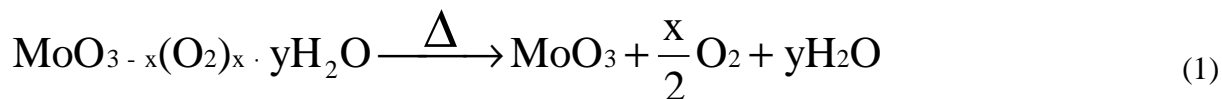

The weight loss of O<sub>2</sub> and the total weight loss could be shown in Equation (2) and (3) respectively:

$$\text{Weight loss (O}_2\text{) \%} = \frac{\frac{x}{2}M_{\text{O}_2}}{M_{\text{MoO}_{3-x}(\text{O}_2)_x \cdot y\text{H}_2\text{O}}} \times 100\% \quad (2)$$

$$\text{Total weight loss (O}_2 + \text{H}_2\text{O) \%} = \frac{\frac{x}{2}M_{\text{O}_2} + yM_{\text{H}_2\text{O}}}{M_{\text{MoO}_{3-x}(\text{O}_2)_x \cdot y\text{H}_2\text{O}}} \times 100\% \quad (3)$$

where  $M$  is the molecular weight. From the weight loss of O<sub>2</sub> and total weight loss, the value  $x$  and  $y$  in the nominal formula could be calculated.

Temperature programmed decomposition-mass spectrometry (TPDE-MS) and the external standard method were carried out in a quartz microreactor coupled to an Omnistar<sup>TM</sup> GSD 301 O3 mass spectrograph. The carrier gas used was N<sub>2</sub> at a flow rate of 25 mL·min<sup>-1</sup>.

Before the TPDE-MS investigation, about 0.2000g sample obtained at 81.5 °C was heated at 70 °C until the O<sub>2</sub> signal had been calm and been held under 10<sup>-13</sup>. When TPDE was carried out with a 15 °C·min<sup>-1</sup> heating ramp, the O<sub>2</sub> ( $m/e=32$ ) profile was recorded.

In the external standard method, the injection was performed before the blank quartz reactor which was kept at 200 °C.

All the calculations concerning the quantitative analysis were performed with the external standard by measurement of the peak areas. The peak area of each dose of O<sub>2</sub> was plotted against the volume to obtain the calibration graph. The 6 volumes were subjected to regression analysis to calculate the calibration equation and correlation coefficient. Linearity was obtained between the peak area and the volume of 0.5-5.0 mL with  $R^2=0.99962$  for O<sub>2</sub>.

$$\text{Equation: } y = 2.56757 \times 10^{-9} \cdot x - 1.694 \times 10^{-10}$$

where  $y$  means the peak area, and  $x$  means the volume (mL).

The volume of O<sub>2</sub> was about 4.6 mL (standard temperature and pressure), equal to about 3.3% of weight loss.

From the weight loss of O<sub>2</sub> (3.3%) and total weight loss (11.6%), the value x (0.33) and y (0.75) in the nominal formula could be calculated.

**Reference:**

[1] Segawa, K.; Ooga, K.; Kurusu, Y. *Bull. Chem. Soc. Jpn.* **1984**, 57, 2721

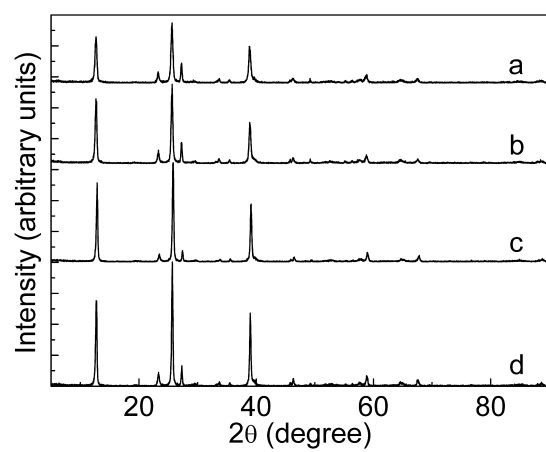

**Figure S1.** XRD patterns of solid products prepared from the 0.9 mol/L molybdenum solution at 170 °C for different time: (a) 1 h, (b) 5h, (c) 20h, and (d) 45h (Figure S1d is identical with Figure 2e).
